# Supplementary material for: Porous core–shell structured MoO2–Mo2C@C electrocatalysts for pH-universal hydrogen evolution reaction
Source: Royal Society of Chemistry journal article supplement (doi:10.1039/d3ta06178g), 2023-12-12
Supplement: d3ta06178g1.pdf [file d3ta06178g1.pdf]

## Supporting Information

### **Porous core-shell structured MoO<sub>2</sub>-Mo<sub>2</sub>C@C electrocatalysts for pH-universal hydrogen evolution reaction**

Xinglong Zhang<sup>a,b</sup>, Tingxi Chen<sup>c</sup>, Ning Lu<sup>a</sup>, Feiyu Jian<sup>a</sup>, Bin Zhu<sup>a</sup>, Yanning Zhang<sup>c,d\*</sup>,  
Liang He<sup>c</sup>, Hui Tang<sup>a\*</sup>

<sup>a</sup> *Department of Materials and Energy, University of Electronic Science and Technology of China, Chengdu 611731, P. R. China*

<sup>b</sup> *Department of Materials Science, Fudan University, Shanghai 200438, P. R. China*

<sup>c</sup> *Institute of Fundamental and Frontier Sciences, University of Electronic Science and Technology of China, Chengdu 611731, China*

<sup>d</sup> *Key Laboratory of Quantum Physics and Photonic Quantum Information, Ministry of Education of China, University of Electronic Science and Technology of China, Chengdu 611731, China*

<sup>e</sup> *School of Mechanical Engineering, Sichuan University, Chengdu 610065, P. R. China*

Density functional calculations were carried out with the Vienna *ab initio* simulation package (VASP). The Perdew-Burke-Ernzerhof (PBE) function, under the generalized gradient approximation (GGA), was used to describe the exchange-correlation function. The cut-off energy was set to 500 eV, and all the atoms were relaxed by the conjugate gradient (CG) method until the maximum force of each atom was less than 0.02 eV/Å. A 2×2 supercell in the lateral plane was applied to calculate the formation energy of the defects. We used a 5×7×1 Monkhorst-Pack special *k*-point mesh for the primitive unit cell, with 56 atoms, and the single  $\Gamma$  point for the supercell with 224 atoms.

The formation energy of defects is calculated to understand the transformation from MoO<sub>2</sub> (011) to Mo<sub>2</sub>C (100) during heat preservation, which is defined as follows.

$$E_f = (E_{def} - E_{pris} \pm nE_i)/n,$$

Where  $E_{pris}$  and  $E_{def}$  represent the total energies of the pristine slab and the supercell with defects, respectively,  $n$  is the number of defects and  $E_i$  is the atomic energy of constituent  $i$ . The atomic energies of a single C atom in graphite and an O atom in CO<sub>2</sub> were used here as energy references.

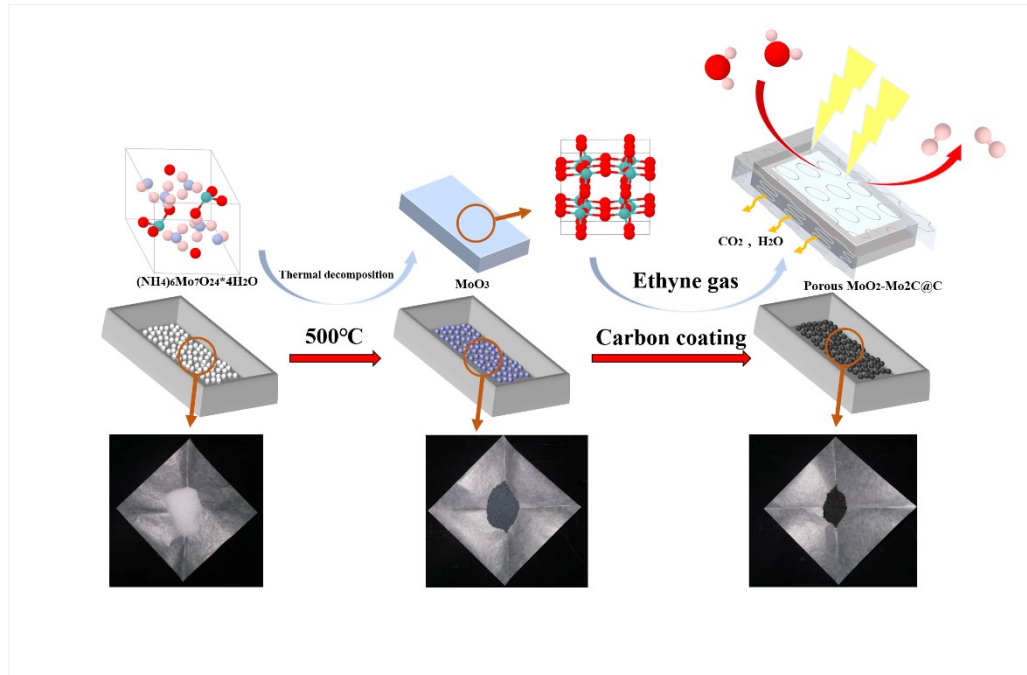

**FigureS1.** Schematic illustration of synthesis procedure of MoO<sub>2</sub>-Mo<sub>2</sub>C@C catalysts

The synthetic procedure of  $\text{MoO}_2\text{-Mo}_2\text{C@C}$  is schematically displayed in the graphic abstract. The  $\text{MoO}_3$  nanoflake was first synthesized through a thermal decomposition method. After that, the porous core-shell  $\text{MoO}_2\text{-Mo}_2\text{C@C}$  was fabricated by a carbon coating process.

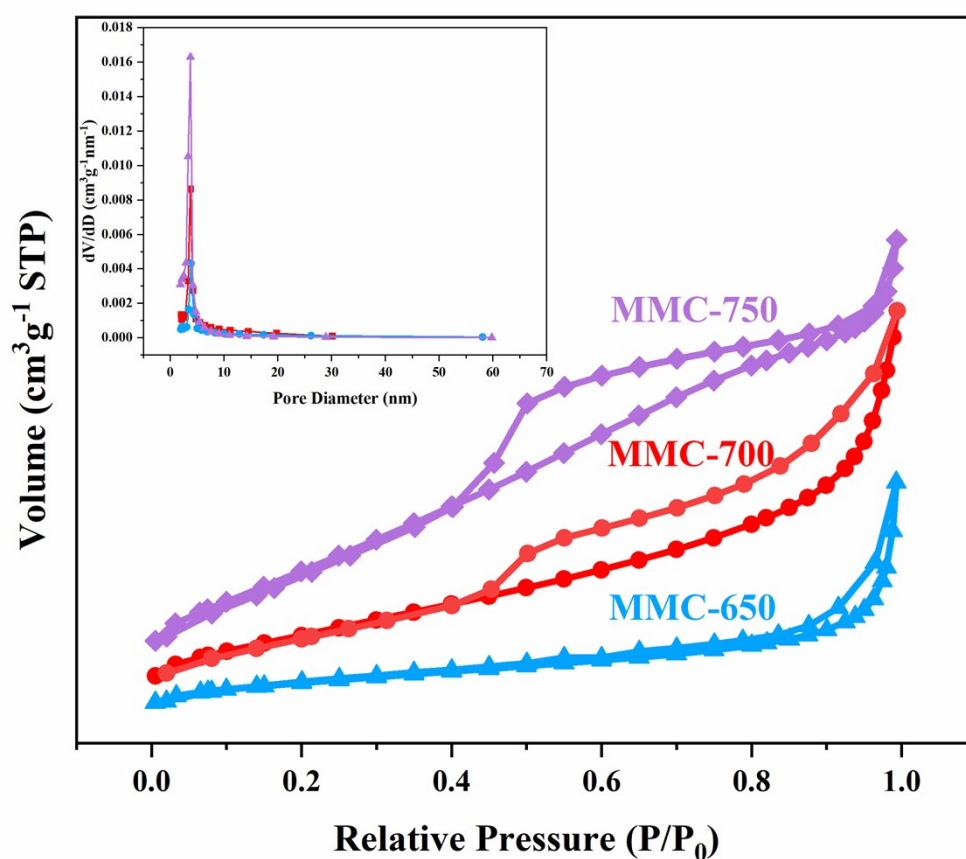

**Figure S2.**  $\text{N}_2$  adsorption-desorption isotherms (inset: pore size distribution).

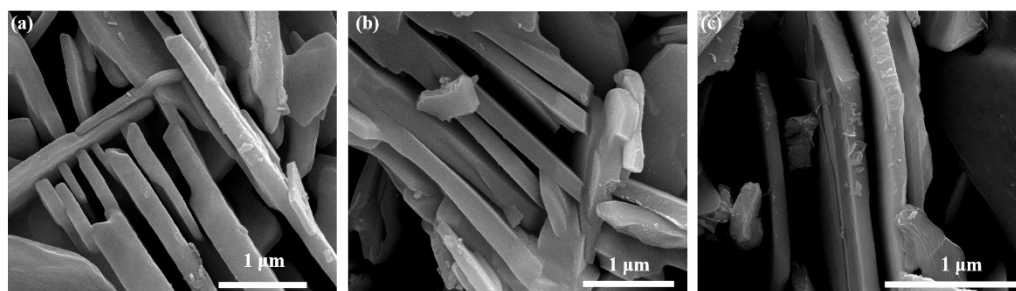

**Figure S3.** SEM images of (a) MMC-650, (b) MMC-700, (c) MMC-750.

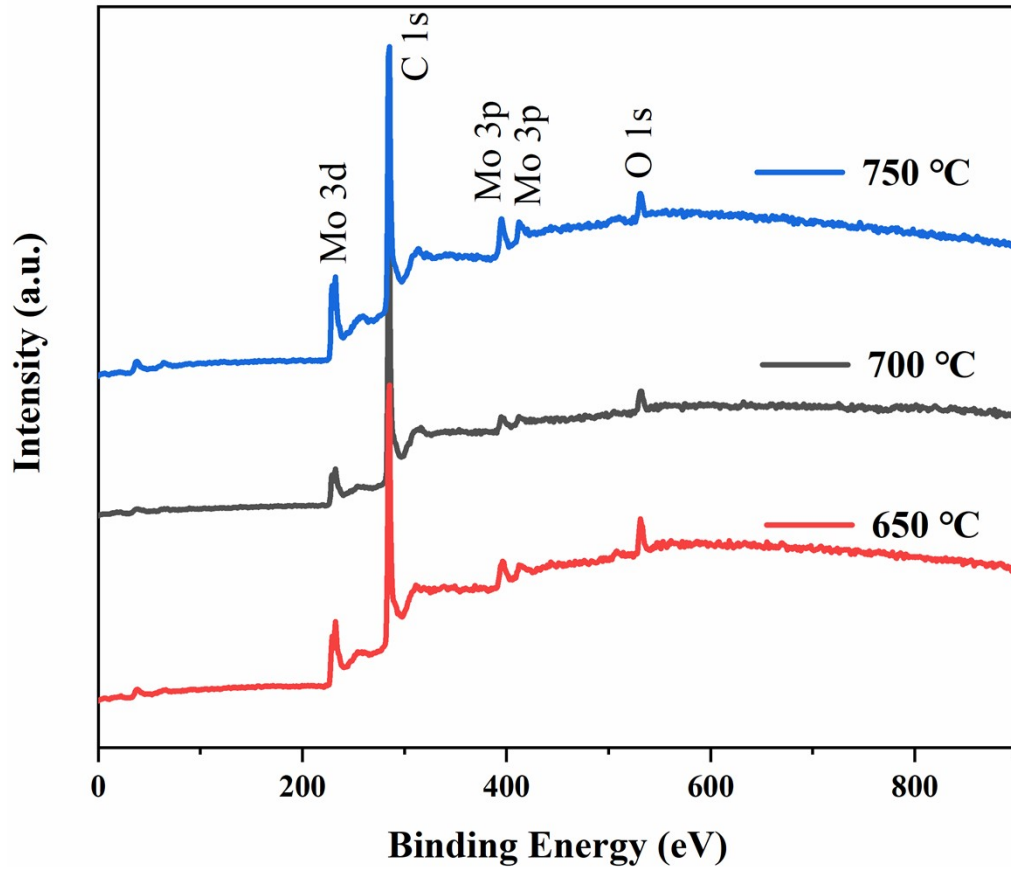

**Figure S4.** The wide XPS spectra of MMC-650, MMC-700 and MMC-750.

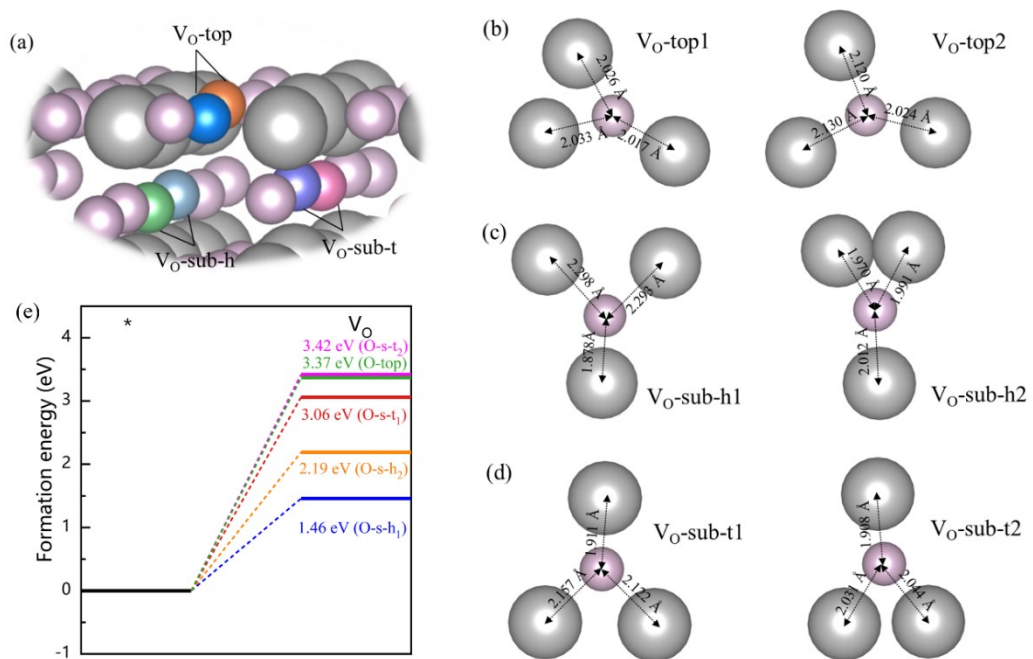

**Figure S5.** Six types of O atoms in the  $\text{MoO}_2$  (011) surface. (a) Diagram of six types of O atoms, and the spheres marked with different colors represent six different

O atoms. (b)-(d) The coordination environment of O atoms and the bond lengths of Mo-O. To facilitate the discussion, the structures were renumbered as  $V_{O\text{-top}_n}$ ,  $V_{O\text{-sub-}h_n}$  and  $V_{O\text{-sub-}t_n}$  ( $n = 1,2$ ). The grey and purple spheres represent Mo and O atoms, respectively. (e) Formation energies of six types of O vacancy.

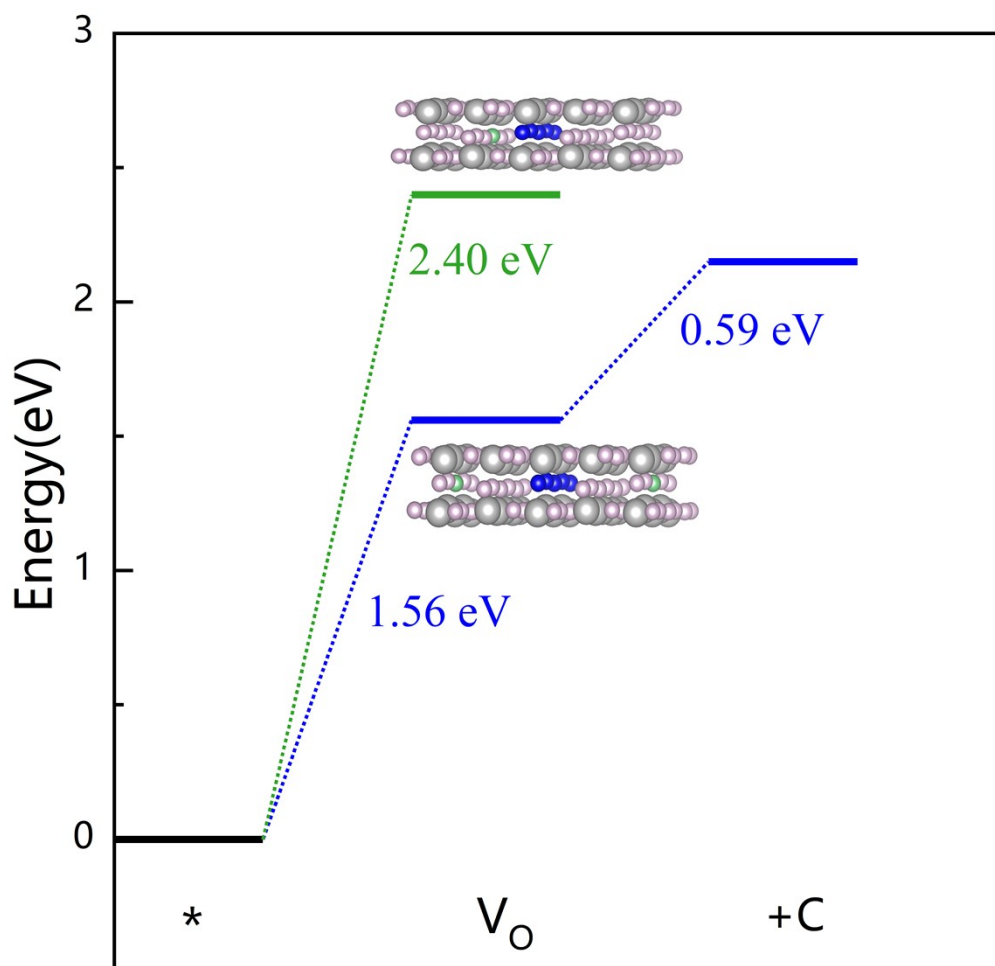

**Figure S6.** The minimum energy paths of the substitution reaction in the second round. The insets show the  $V_O$  (green spheres) configuration. Blue, green, grey and purple spheres represent C, O vacancies, Mo and O atoms, respectively.

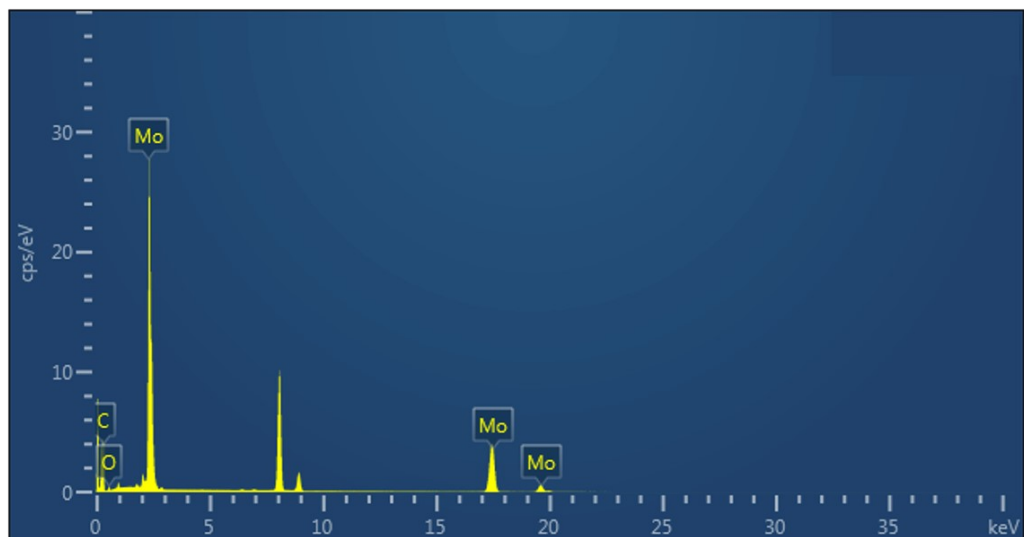

**Figure S7.** EDS spectrum of MMC-700.

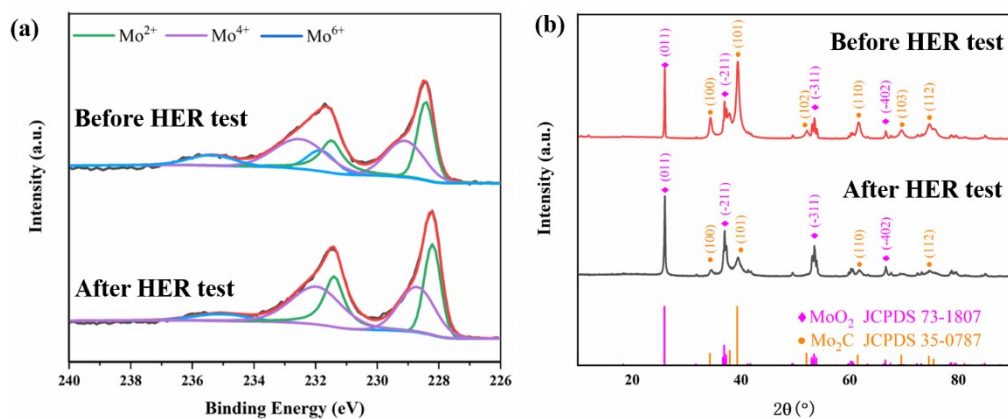

**Figure S8.** (a) XPS spectrum of Mo 3d before and after HER test. (b) XRD result of MMC-700 before and after HER test.

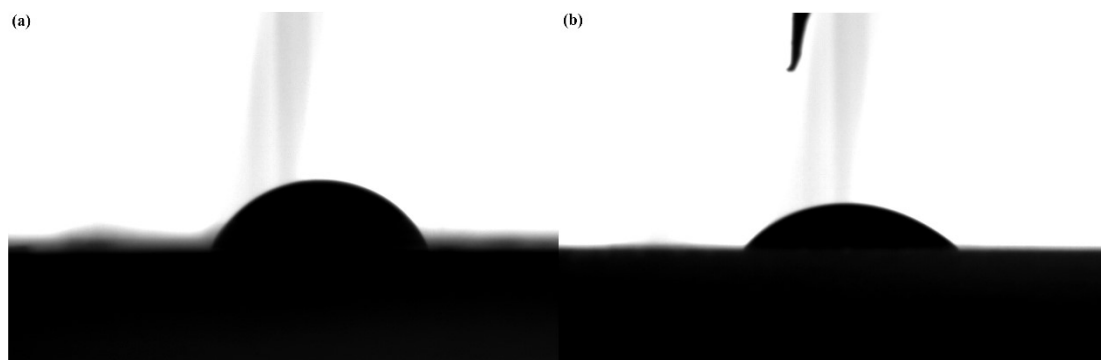

**Figure S9.** (a) Contact angle test image of MoO<sub>3</sub>. (b) Contact angle test image of MoO<sub>2</sub>-Mo<sub>2</sub>C@C.

**Table S1.** The mass percentage and atomic percentage of elements of MMC-700 according to the EDS elemental mapping results.

| Element | Line type        | K factor | Wt.%  | At.%  |
|---------|------------------|----------|-------|-------|
| C       | K-line<br>system | 2.742    | 10.15 | 46.58 |
| O       | K-line<br>system | 2.001    | 0.64  | 2.19  |
| Mo      | K-line<br>system | 4.910    | 89.21 | 51.23 |

**Table S2.** Comparison of the required overpotentials ( $\eta$ ) in obtaining the current density of 10 mA/cm<sup>2</sup> and the electrochemically double layer capacitance ( $C_{dl}$ ) with recently reported Mo<sub>2</sub>C-based HER catalysts in 0.5 M H<sub>2</sub>SO<sub>4</sub>.

| Catalysts                                | Overpotential<br>(mV@10<br>mA cm <sup>-2</sup> ) | $C_{dl}$<br>(mF cm <sup>-2</sup> ) | Ref.                 |
|------------------------------------------|--------------------------------------------------|------------------------------------|----------------------|
| NP-Mo <sub>2</sub> C                     | 210                                              | 29.4                               | 1                    |
| NS-Mo <sub>2</sub> C                     | 223                                              | 5.8                                | 1                    |
| Ni/ $\beta$ -Mo <sub>2</sub> C           | 192                                              | 1.52                               | 2                    |
| Mo <sub>2</sub> C@Graphitic<br>Carbon    | 151                                              | 32                                 | 3                    |
| Co/ $\alpha$ -Mo <sub>2</sub> C          | 196                                              | 40                                 | 4                    |
| MoC/Mo <sub>2</sub> C-690                | 159                                              | 28.25                              | 5                    |
| Mo <sub>2</sub> C/C                      | 180                                              | 10..9                              | 6                    |
| Mo <sub>2</sub> C/VC@C                   | 122                                              | 3.8                                | 7                    |
| VN/Mo <sub>2</sub> C                     | 140                                              | 45                                 | 8                    |
| N-Mo <sub>2</sub> C@NC                   | 136                                              | 12.01                              | 9                    |
| <b>MoO<sub>2</sub>-Mo<sub>2</sub>C@C</b> | <b>176</b>                                       | <b>50.7</b>                        | <b>This<br/>work</b> |

**Table S3.** Comparison of the required overpotentials ( $\eta$ ) in obtaining the current density of 10 mA/cm<sup>2</sup> and the electrochemically double layer capacitance ( $C_{dl}$ ) with recently reported Mo<sub>2</sub>C-based HER catalysts in 1 M KOH.

| Catalysts | Overpotential<br>(mV@10<br>mA cm <sup>-2</sup> ) | Tafel<br>slope<br>(mV dec <sup>-1</sup> ) | Ref. |
|-----------|--------------------------------------------------|-------------------------------------------|------|
|-----------|--------------------------------------------------|-------------------------------------------|------|

|                                          |            |             |                  |
|------------------------------------------|------------|-------------|------------------|
| Ni/ $\beta$ -Mo <sub>2</sub> C           | 157        | 86          | 2                |
| MoC-Mo <sub>2</sub> C-690                | 132        | 40.2        | 5                |
| Mo <sub>2</sub> C@NPC                    | 72         | 15.1        | 10               |
| Mo <sub>2</sub> C/C                      | 210        | 23.1        | 6                |
| CoP/Mo <sub>2</sub> C-NC                 | 103        | 90          | 11               |
| Sn-Mo <sub>2</sub> C@C                   | 144        | 38.56       | 12               |
| $\beta$ -Mo <sub>2</sub> C@C             | 146        | 35.6        | 13               |
| MoS <sub>2</sub> -Mo <sub>2</sub> C      | 109        | 99          | 14               |
| Co, Mo <sub>2</sub> C-CNF                | 128        | 108.9       | 15               |
| Ni-Mo <sub>2</sub> C/NCNFs               | 143        | 29.41       | 16               |
| <b>MoO<sub>2</sub>-Mo<sub>2</sub>C@C</b> | <b>129</b> | <b>60.1</b> | <b>This work</b> |

## References

1. D. Wang, T. Liu, J. Wang and Z. Wu, *Carbon*, 2018, **139**, 845-852.
2. T. Ouyang, A. N. Chen, Z. Z. He, Z. Q. Liu and Y. Tong, *Chem. Commun.*, 2018, **54**, 9901-9904.
3. J. Zhu, Y. Yao, Z. Chen, A. Zhang, M. Zhou, J. Guo, W. D. Wu, X. D. Chen, Y. Li and Z. Wu, *ACS Appl. Mater. Interfaces*, 2018, **10**, 18761-18770.
4. A. M. Gómez-Marín and E. A. Ticianelli, *Appl. Catal., B*, 2017, **209**, 600-610.
5. W. Liu, X. Wang, F. Wang, K. Du, Z. Zhang, Y. Guo, H. Yin and D. Wang, *Nat. Commun.*, 2021, **12**, 6776.
6. D. Wang, J. Wang, X. Luo, Z. Wu and L. Ye, *ACS Sustainable Chem. Eng.*, 2017, **6**, 983-990.
7. C. Huang, X. Miao, C. Pi, B. Gao, X. Zhang, P. Qin, K. Huo, X. Peng and P. K. Chu, *Nano Energy*, 2019, **60**, 520-526.
8. L. Feng, S. Li, D. He, L. Cao, G. Li, P. Guo and J. Huang, *ACS Sustainable Chem. Eng.*, 2021, **9**, 15202-15211.
9. Q. Jing, J. Zhu, X. Wei, Y. Lin, X. Wang and Z. Wu, *J. Colloid Interface Sci.*, 2021, **602**, 520-533.
10. C. Lu, D. Tranca, J. Zhang, F. N. Rodri Guez Hernandez, Y. Su, X. Zhuang, F. Zhang, G. Seifert and X. Feng, *ACS Nano*, 2017, **11**, 3933-3942.
11. T. Liu, S. Zhou, J. Qi, K. Wang, L. Zheng, Q. Huang, T. Zhou and J. Zhang, *J. Energy Chem.*, 2021, **58**, 370-376.
12. L. Zhang, K. Wei, J. Ma, J. Wang, Z. Liu, R. Xing and T. Jiao, *Appl. Surf. Sci.*, 2021, **566**, 150754.
13. Q. Yan, X. Yang, T. Wei, C. Zhou, W. Wu, L. Zeng, R. Zhu, K. Cheng, K. Ye, K. Zhu, J. Yan, D. Cao and G. Wang, *J. Colloid Interface Sci.*, 2020, **563**, 104-111.
14. Z. Zhao, F. Qin, S. Kasiraju, L. Xie, M. K. Alam, S. Chen, D. Wang, Z. Ren, Z. Wang, L. C. Grabow and J. Bao, *ACS Catal.*, 2017, **7**, 7312-7318.
15. J. Wang, R. Zhu, J. Cheng, Y. Song, M. Mao, F. Chen and Y. Cheng, *Chem. Eng. J.*, 2020, **397**, 125481.
16. M. Li, Y. Zhu, H. Wang, C. Wang, N. Pinna and X. Lu, *Adv. Energy Mater.*, 2019, **9**, 1803185.
